# Supplementary material
Source: MDPI journal article supplement (https://www.mdpi.com/2076-3417/14/9/3557)
Supplement: s1 [file s1]

**How intense do you perceive the meat smell and taste? How high is the hardness of the sample?**

You will receive one sample. The judgement of the sample is obtained following the measurement of a linear scale. Please move the slider in the line according to the intensity of the attribute from “not perceivable” to “intense”. The point in the scala represents your opinion of the respective meat quality (for example meat taste).

**Beef meat smell**

not perceivable-----intense

**Beef meat taste**

not perceivable-----intense

**Beef meat hardness**

not perceivable-----intense

**Wie intensiv ist der Rindfleischgeruch und -Geschmack der Probe wahrnehmbar? Wie hoch ist die Festigkeit der Probe?**

Du erhältst eine Probe. Die Bewertung erfolgt mittels einer Linien Skala (Schieberregler). Bitte aufgrund der wahrgenommen Intensität der Merkmale (z.B. Rindfleischgeruch) den Schieber auf der Linie verschieben von nicht wahrnehmbar nach intensiv wahrnehmbar. Der von Dir bestimmte Punkt auf der Skala entspricht Deiner Wahrnehmung für das entsprechende Merkmale (z.B. Rindfleischgeruch)

**Geruch (Rindfleischgeruch)**

nicht wahrnehmbar-----intensiv

**Geschmack (Rindfleischgeschmack)**

nicht wahrnehmbar-----intensiv

**Festigkeit**

nicht wahrnehmbar-----intensiv
